# Supplementary material
Source: PubMed Central journal article supplement (PMC5086548)
Supplement: AEM.01415-16_zam999117508so1.pdf [file AEM.01415-16_zam999117508so1.pdf]

## SUPPLEMENTAL MATERIAL

**Table S1.** Summary of indels in the phage genomes relative to the genome of PaMx43.

|           | Coordinates<br>(PaMx43) | Length<br>(bp) <sup>1</sup> | Phage <sup>2</sup>   | ORF <sup>3</sup> | #         | Coordinates<br>(PaMx43) | Length<br>(bp) <sup>1</sup> | Phage <sup>2</sup> | ORF <sup>3</sup> |
|-----------|-------------------------|-----------------------------|----------------------|------------------|-----------|-------------------------|-----------------------------|--------------------|------------------|
| 1         | 52                      | -1                          | 33, 35, 41, 46, PaP2 | nc <sup>4</sup>  | 21        | 30238                   | +1                          | 41, 119X           | nc               |
| 2         | 126                     | +1                          | 35, 41, 46, 119X     | nc               | <b>22</b> | <b>30753</b>            | <b>+547</b>                 | <b>PaP2</b>        | <b>31</b>        |
| 3         | 285                     | -21                         | 41                   | nc               | 23        | 34777                   | +3                          | 33, 35, 41, 46     | 38               |
| 4         | 297                     | -10/+1                      | 33, 35, 46/ PaP2     | nc               | 24        | 36040                   | +6/+12                      | 35/ 33, 46, PaP2   | 40               |
| <b>5</b>  | <b>1183</b>             | <b>-175</b>                 | <b>119X</b>          | <b>a</b>         | 25        | 37249                   | -3                          | 35, 119X           | 45               |
| 6         | 2058                    | -1                          | 41                   | nc               | 26        | 37835                   | -18                         | 35                 | 47               |
| 7         | 20091                   | -1                          | 35, 41               | nc               | 27        | 37914                   | +6                          | 35                 | 47               |
| 8         | 2265                    | +1                          | 119X                 | nc               | 28        | 37963                   | +3                          | 35                 | 47               |
| 9         | 2991                    | -21                         | 35, 41               | 6                | 29        | 38074                   | +9/-15                      | 35/119X            | 47               |
| 10        | 9844                    | +12                         | 33, 46               | 12               | <b>30</b> | <b>38202</b>            | <b>+303/+506</b>            | <b>41/ 35</b>      | <b>b1, b2</b>    |
| 11        | 11841                   | +1                          | PaP2                 | 17               | 31        | 38316                   | +1                          | 41                 | 48               |
| 12        | 24060                   | +1                          | 33, 46               | nc               | 32        | 38431                   | +15                         | 35                 | 48               |
| 13        | 24081                   | +1                          | 33, 46               | nc               | 33        | 38575                   | +3                          | 35                 | 49               |
| <b>14</b> | <b>24386</b>            | <b>+300</b>                 | <b>119X</b>          | <b>24</b>        | 34        | 38591                   | +12                         | 35                 | 49               |
| 15        | 24890                   | +1                          | 119X                 | nc               | 35        | 42963                   | +12                         | 119X               | 53               |
| 16        | 25006                   | +6                          | 119X                 | nc               | 36        | 43108                   | +23                         | 33, 46, 119X       | nc               |
| 17        | 25023                   | -1                          | 119X                 | nc               | 37        | 43141                   | +1                          | 33, 46             | nc               |
| 18        | 25631                   | -9                          | 119X                 | 27               | 38        | 43171                   | -1                          | 41, 119X           | nc               |
| 19        | 27635                   | +1                          | 41                   | 29               | 39        | 43198                   | +1                          | 41, 119X           | nc               |
| 20        | 30238                   | +1                          | 41, 119X             | nc               |           |                         |                             |                    |                  |

<sup>1</sup> (+) insertions and (-) deletions relative to PaMx43 genome.

<sup>2</sup> Except for PaP2 and 119X, digits correspond to the specific name of PaMx phages.

<sup>3</sup> ORFs affected by the respective indel; nc indicates that the respective indel is located in non-coding regions.

Indels larger than 175 bp are in **bold**; ORFs inside these regions are named **a**, **b** and **c** as in Fig. 1.

**Table S2.** Pairwise single nucleotide polymorphisms (SNP) between phage genomes.

|               | <b>119X</b> | <b>PaP2</b> | <b>PaMx43</b> | <b>PaMx46</b> | <b>PaMx33</b> | <b>PaMx41</b> | <b>PaMx35</b> |
|---------------|-------------|-------------|---------------|---------------|---------------|---------------|---------------|
| <b>119X</b>   | 0           |             |               |               |               |               |               |
| <b>PaP2</b>   | 1733        | 0           |               |               |               |               |               |
| <b>PaMx43</b> | 1804        | 610         | 0             |               |               |               |               |
| <b>PaMx46</b> | 2239        | 1326        | 1407          | 0             |               |               |               |
| <b>PaMx33</b> | 2270        | 1348        | 1429          | 25            | 0             |               |               |
| <b>PaMx41</b> | 1873        | 1001        | 1089          | 1479          | 1499          | 0             |               |
| <b>PaMx35</b> | 1965        | 1176        | 1300          | 1582          | 1605          | 1306          | 0             |

The values indicate the number of one base pair substitution for a given pair of phage genomes.

**Table S3.** Functional annotation ORFS families.

| ORF    | Length (aa) | BlastP, most significant matches<br>[organism; e-value]               | Conserved Domains <sup>1</sup>                                     | Structural similarity <sup>2</sup><br>[organism; e-value]           | Function                                    |
|--------|-------------|-----------------------------------------------------------------------|--------------------------------------------------------------------|---------------------------------------------------------------------|---------------------------------------------|
| ORF_1  | 212         | XP_001621223.1<br>[ <i>Nematostella vectensis</i> ; 1e-15]            | –                                                                  | –                                                                   | Hypothetical protein                        |
| ORF_a  | 65          | No significant similarity found                                       | –                                                                  | –                                                                   | Hypothetical protein (ORFan)                |
| ORF_2  | 99          | No significant similarity found                                       | –                                                                  | –                                                                   | Hypothetical protein                        |
| ORF_3  | 69          | No significant similarity found                                       | –                                                                  | –                                                                   | Hypothetical protein                        |
| ORF_4  | 194         | EKD22471.1 [uncultured bacterium,<br>groundwater metagenome; 3e-11]*  | Coiled-coil domain                                                 | 4DYQ, Small terminase<br>[Bacteriophage Sf6; 0.3]                   | Putative Small terminase                    |
| ORF_5  | 48          | No significant similarity found                                       | –                                                                  | –                                                                   | Hypothetical protein                        |
| ORF_6  | 529         | AEI70966.1<br>[EBPR podovirus 3; 2e-117]*                             | –                                                                  | 4BIJ, Large terminase<br>[Bacteriophage T7; 8.4e-54]                | Putative Large terminase                    |
| ORF_7  | 666         | EKD22468.1 [uncultured bacterium,<br>groundwater metagenome; 3e-134]* | –                                                                  | 3LJ5, Portal protein<br>[bacteriophage P22; 1e-7]                   | Putative Portal protein<br>(virion protein) |
| ORF_8  | 189         | WP_028627490.1<br>[ <i>Pseudomonas resinovorans</i> ; 7e-11]          | P-loop containing nucleoside triphosphate<br>hydrolase (IPR027417) | 3TUI, ATP-binding domain of<br>Methionine import [E. coli, 3.3e-29] | Nucleotide monophosphate<br>kinase          |
| ORF_9  | 122         | No significant similarity found                                       | –                                                                  | –                                                                   | Hypothetical protein                        |
| ORF_10 | 248         | EKD22466.1 [uncultured bacterium,<br>groundwater metagenome; 2e-17]*  | –                                                                  | –                                                                   | Hypothetical protein (virion<br>protein)    |
| ORF_11 | 418         | AEI70970.1<br>[EBPR podovirus 3; 4e-99]*                              | –                                                                  | 1OHG, major capsid protein<br>[Bacteriophage HK97; 26]              | Major capsid protein (virion<br>protein)    |
| ORF_12 | 138         | No significant similarity found                                       | –                                                                  | –                                                                   | Hypothetical protein                        |
| ORF_13 | 217         | No significant similarity found                                       | –                                                                  | –                                                                   | Hypothetical protein (virion<br>protein)    |
| ORF_14 | 115         | No significant similarity found                                       | 3 Transmembrane domains, non-cytoplasmic<br>domain                 | –                                                                   | Hypothetical protein                        |
| ORF_15 | 133         | No significant similarity found                                       | 3 Transmembrane domains, non-cytoplasmic<br>domain                 | –                                                                   | Putative Holyn                              |
| ORF_16 | 116         | WP_011192942.1<br>[ <i>Yersinia pseudotuberculosis</i> ; 4e-32]       | D-alanyl-D-alanine carboxypeptidase<br>(SSF55166)                  | 2MXZ, Endolysin<br>[Bacteriophage T5; 3.9-33]                       | Putative Endolysin                          |
| ORF_17 | 128         | No significant similarity found                                       | Transmembrane domain, non-cytoplasmic<br>domain                    | –                                                                   | Putative Rz-like                            |
| ORF_18 | 98          | No significant similarity found                                       | Non-cytoplasmic domain, Lipoprotein signal                         | –                                                                   | Putative Rz1-like                           |

|        |      |                                                                   |                                        |                                                                                |                                               |
|--------|------|-------------------------------------------------------------------|----------------------------------------|--------------------------------------------------------------------------------|-----------------------------------------------|
| ORF_19 | 123  | No significant similarity found                                   | -                                      | -                                                                              | Hypothetical protein                          |
| ORF_20 | 1031 | EKD22434.1 [uncultured bacterium, groundwater metagenome; 4e-39]* | -                                      | -                                                                              | Hypothetical protein (virion protein)         |
| ORF_21 | 305  | EKD22433.1 [uncultured bacterium, groundwater metagenome; 4e-16]* | -                                      | -                                                                              | Hypothetical protein (virion protein)         |
| ORF_22 | 577  | No significant similarity found                                   | -                                      | -                                                                              | Hypothetical protein (virion protein)         |
| ORF_23 | 1849 | AEI70980.1 [EBPR podovirus 3; 0.0]*                               | -                                      | -                                                                              | Hypothetical protein (virion protein)         |
| ORF_24 | 93   | WP_004859226.1 [ <i>Acinetobacter geroi</i> ; 5e-27]              | -                                      | -                                                                              | Phage conserved Hypothetical protein          |
| ORF_25 | 166  | WP_044767099.1 [ <i>Streptococcus suis</i> ; 0.03]                | -                                      | -                                                                              | Hypothetical protein                          |
| ORF_26 | 84   | No significant similarity found                                   | -                                      | -                                                                              | Hypothetical protein                          |
| ORF_27 | 296  | WP_003356576.1 [ <i>Pseudomonas fluorescens</i> ; 4e-14]          | -                                      | 2Q73, MazG [ <i>Vibrio</i> sp. DAT 722; 1.2e-20]                               | Putative MazG-like protein                    |
| ORF_28 | 417  | EKD22461.1 [uncultured bacterium, water metagenome; 2e-82]*       | DUF3987                                | 1W5S, Origin Recognition Complex Protein 2 [ <i>Aeropyrum pernix</i> ; 0.0016] | Putative Primase                              |
| ORF_29 | 801  | AEI70990.1 [EBPR podovirus 3; 2e-174]*                            | DNA_pol_A (PF00476)                    | 2KFN, Klenow Fragment DNA Polymerase I [ <i>E. coli</i> , 3e-116]              | Putative DNA polymerase                       |
| ORF_30 | 109  | No significant similarity found                                   | -                                      | -                                                                              | Hypothetical protein                          |
| ORF_31 | 171  | EKD22459.1 [uncultured bacterium, groundwater metagenome; 2e-12]* | Coiled-coil domain                     | -                                                                              | Hypothetical protein                          |
| ORF_32 | 318  | EKD22458.1 [uncultured bacterium, groundwater metagenome; 9e-66]* | AAA+ ATPase (PF13479)                  | 2CVH, Rad51 homologue [ <i>Thermococcus kodakaraensis</i> ; 8.4e-4]            | Putative DNA repair and recombination protein |
| ORF_33 | 85   | WP_007341107.1 [ <i>Neisseria bacilliformis</i> ; 2e-4]           | -                                      | -                                                                              | Hypothetical protein                          |
| ORF_34 | 155  | WP_030031775.1 [ <i>Clostridium botulinum</i> ; 2e-7]             | -                                      | -                                                                              | Hypothetical protein                          |
| ORF_35 | 78   | YP_006382361.1 [Escherichia phage bV_EcoS_AKFV33; 1e-11]          | -                                      | -                                                                              | Phage conserved protein                       |
| ORF_36 | 224  | No significant similarity found                                   | Ribonuclease H-like domain (IPR012337) | 1W0H, 3'-5'-exoribonuclease [ <i>Homo sapiens</i> , 1.5e-5]                    | Putative 3'-5'-exoribonuclease                |
| ORF_37 | 341  | EKD22454.1 [uncultured bacterium, groundwater metagenome; 1e-59]* | PDDEXK_1 nuclease family (PF12705)     | 3U4Q, Helicase/nuclease subunit A [ <i>Bacillus subtilis</i> ; 8.4e-3]         | Helicase/nuclease                             |
| ORF_38 | 107  | No significant similarity found                                   | -                                      | -                                                                              | Hypothetical protein                          |
| ORF_39 | 61   | No significant similarity found                                   | -                                      | -                                                                              | Hypothetical protein                          |

|         |     |                                                                    |                                                                                                      |                                                            |                              |
|---------|-----|--------------------------------------------------------------------|------------------------------------------------------------------------------------------------------|------------------------------------------------------------|------------------------------|
| ORF_40  | 236 | AEI71000.1<br>[EBPR podovirus 3; 1e-6]*                            | -                                                                                                    | -                                                          | Hypothetical protein         |
| ORF_41  | 100 | No significant similarity found                                    | -                                                                                                    | -                                                          | Hypothetical protein         |
| ORF_42  | 145 | No significant similarity found                                    | -                                                                                                    | -                                                          | Hypothetical protein         |
| ORF_43  | 97  | No significant similarity found                                    | 2 Transmembrane domains, non-cytoplasmic domain                                                      | -                                                          | Hypothetical protein         |
| ORF_44  | 85  | No significant similarity found                                    | -                                                                                                    | -                                                          | Hypothetical protein         |
| ORF_45  | 108 | No significant similarity found                                    | -                                                                                                    | -                                                          | Hypothetical protein         |
| ORF_46  | 108 | No significant similarity found                                    | -                                                                                                    | -                                                          | Hypothetical protein         |
| ORF_47  | 139 | No significant similarity found                                    | -                                                                                                    | -                                                          | Hypothetical protein         |
| ORF_b.1 | 97  | No significant similarity found                                    | -                                                                                                    | -                                                          | Hypothetical protein (ORFan) |
| ORF_b.2 | 51  | No significant similarity found                                    | -                                                                                                    | -                                                          | Hypothetical protein (ORFan) |
| ORF_48  | 114 | No significant similarity found                                    | -                                                                                                    | -                                                          | Hypothetical protein         |
| ORF_49  | 78  | No significant similarity found                                    | -                                                                                                    | -                                                          | Hypothetical protein         |
| ORF_50  | 683 | EKD22442.1 [uncultured bacterium, groundwater metagenome; 6e-121]* | DNA2/NAM helicase (PTHR10887; 6.6E-25),<br>UvrD-like helicase C-terminal domain<br>(PF13538; 6.6-17) | 3E1S, RecD2<br>[ <i>Deinococcus radiodurans</i> ; 1.3e-58] | Putative Helicase            |
| ORF_51  | 110 | No significant similarity found                                    | -                                                                                                    | -                                                          | Hypothetical protein         |
| ORF_52  | 342 | No significant similarity found                                    | -                                                                                                    | -                                                          | Hypothetical protein         |
| ORF_53  | 227 | EKD99106.1 [uncultured bacterium, groundwater metagenome; 1e-44]*  | -                                                                                                    | -                                                          | Hypothetical protein         |

1 Conserved domains search was performed with InterPro.

2 HHpred structural similarity predictions.

\* Sequences from metagenomic data.

Gray highlighted lines indicate genes encoding virion proteins.

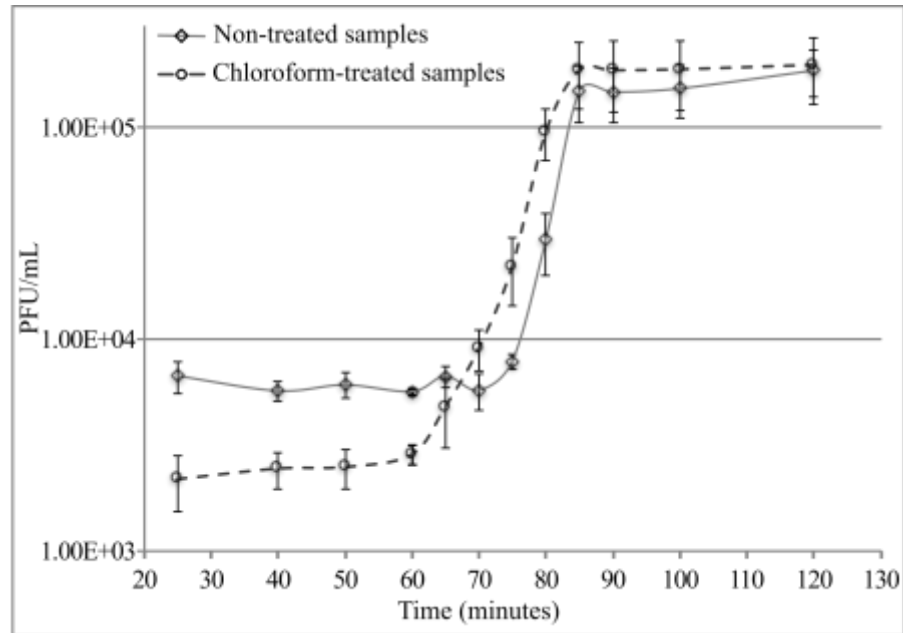

**FIG S1.** One-step growth curve of PaMx41 infecting the clinical strain Ps26. Infections were carried out in LB media at 37°C (see Methods). PFU/mL were quantified at the indicated times after infection, each quantification represents the average of three independent experiments, error bars indicate standard deviation.

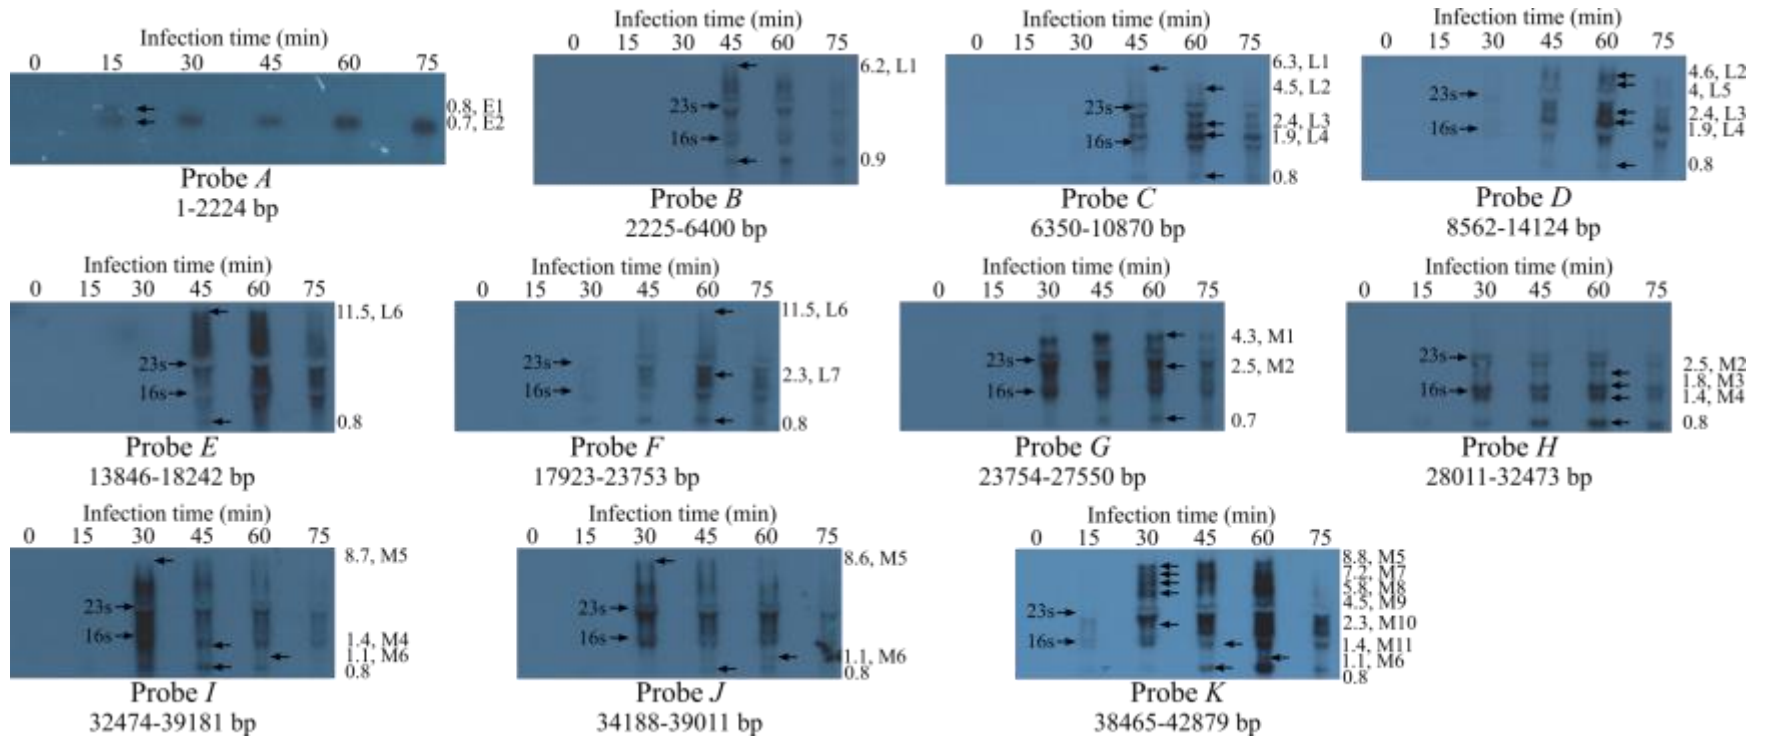

**FIG S2.** Northern blot set of the viral mRNA identification during PaMx41 infection. Northern blots of total RNA isolated from Ps26 infected cells at the indicated time after infection. RNA samples were hybridized with the indicated probes described in figure 5B, the position covered by each probe is indicated. Each detected signal is indicated with a black arrow, their estimated sizes are given in kbs. The 0-minutes sample is total RNA isolated from uninfected cells.
